# Supplementary material
Source: PubMed Central journal article supplement (PMC3594021)
Supplement: mt2012228x1.pdf [file mt2012228x1.pdf]

**Supplementary Table s1.** List of gene-specific primer sequences used for quantitative real-time PCR.

| <b>Forward primer</b> | <b>Sequence (5'-3')</b> | <b>Reverse primer</b> | <b>Sequence (5'-3')</b> |
|-----------------------|-------------------------|-----------------------|-------------------------|
| β2m                   | atggaagccgaacatactg     | β2m                   | cagtctcagtggggggtgaat   |
| H2D                   | gagtgagcctgaggaacctg    | H2D                   | agccagacatctgctggagt    |
| CD3                   | tctcggaagtcgaggacagt    | CD3                   | ttgaggctgggtgttagca     |
| CD4                   | aggaagtgaacctgggtgtg    | CD4                   | ctcctgcttcagggtcagtc    |
| CD8                   | actgcaaggaagcaagtgg     | CD8                   | caccgctaaaggcagttctc    |
| GAPDH                 | tggcaaagtggagattgtg     | GAPDH                 | aagatgggtgatgggcttccc   |
| IFN-β                 | ccctatggagatgacggaga    | IFN-β                 | actgaggtggctgctctgc     |
| IFN-γ                 | gcgtcattgaatcacacctg    | IFN-γ                 | tgagctcattgaatgcttgg    |
| IL-4                  | cctcacagcaacgaagaaca    | IL-4                  | aaatatgcgaagcaccttgg    |
| IL-6                  | ccggagaggagacttcacag    | IL-6                  | tccacgatttcccagagAAC    |
| IL-10                 | ccaggagatcctttgatga     | IL-10                 | aactggccacagtttccagg    |
| Reovirus S4           | ggaacattgtgagagcagca    | Reovirus S4           | cccttcgggtagtggtagaa    |
| TAP1                  | ctgttcaggctctgctctcc    | TAP1                  | ccacaaggccttcatgttt     |
| TAP2                  | gctgtggggactgctaaaag    | TAP2                  | gcagaagccactcggactac    |
| TNF-α                 | tgttgcctcctcttttgctt    | TNF-α                 | tggtcaccaaatcagcgta     |
